# Supplementary material for: Synthesis of a MoO3/Ti3C2Tx composite with enhanced capacitive performance for supercapacitors
Source: Royal Society of Chemistry journal article supplement (doi:10.1039/c6ra15651g), 2016-01-01
Supplement: c6ra15651g1.pdf [file c6ra15651g1.pdf]

Supporting information for:

**Synthesis of  $\text{MoO}_3/\text{Ti}_3\text{C}_2\text{T}_x$  composite with enhanced capacitive performance for  
supercapacitors**

Jianfeng Zhu, Xiao Lu, Lei Wang

*School of Materials Science and Engineering, Shaanxi University of Science &  
Technology, Xi'an 710021, China*

Email: [Xiao\\_Lu\\_1721@163.com](mailto:Xiao_Lu_1721@163.com) & [zhujf@sust.edu.cn](mailto:zhujf@sust.edu.cn)

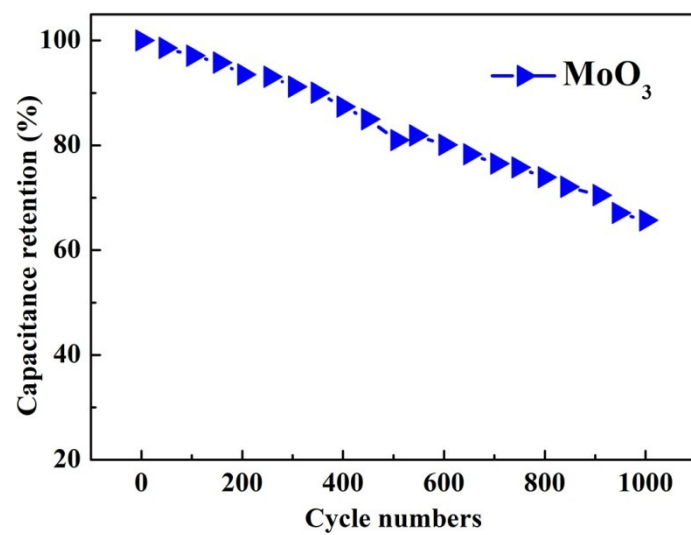

**Fig. S1** Cycle stability of MoO<sub>3</sub> at a current density of 1A·g<sup>-1</sup> in 1M KOH solution.
